# Supplementary material for: Positive cfDNA screening results for 22q11.2 deletion syndrome—Clinical and laboratory considerations
Source: Frontiers journal article supplement (doi:10.3389/fgene.2023.1146669), 2023-03-10
Supplement: Data_Sheet_1.pdf [file Data_Sheet_1.pdf]

## *Supplementary Material*

### **Positive cfDNA screening results for 22q11.2 deletion syndrome – clinical and laboratory considerations**

Erica Soster<sup>1\*†</sup>, Brittany Dyr<sup>1†</sup>, Jill Rafalko<sup>1,2</sup>, Eyad Almasri<sup>1</sup>, Philip Cacheris<sup>1</sup>

\* **Correspondence:** Erica Soster: [sostere@labcorp.com](mailto:sostere@labcorp.com)

#### **1 Supplementary Data**

*Supplemental Figure 1* – Estimated breakpoints from cfDNA sequencing data

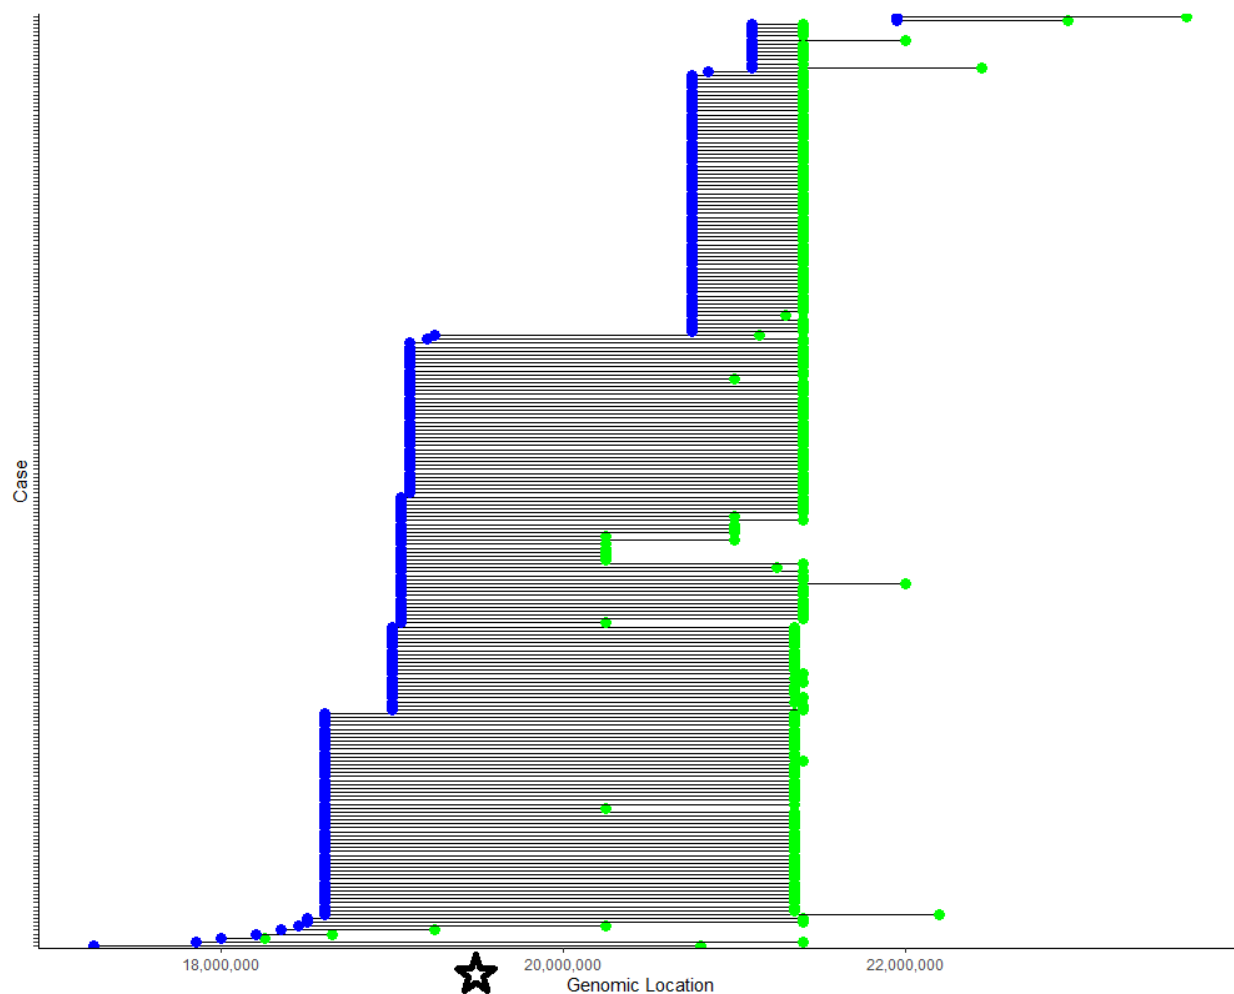

*Supplemental Figure 2* – Three box and whisker plots showing the comparison of deletion size for

cases with and without ultrasound findings when (A) including all cases and (B) when removing suspected maternal cases and (C) looking at only confirmed fetal cases.

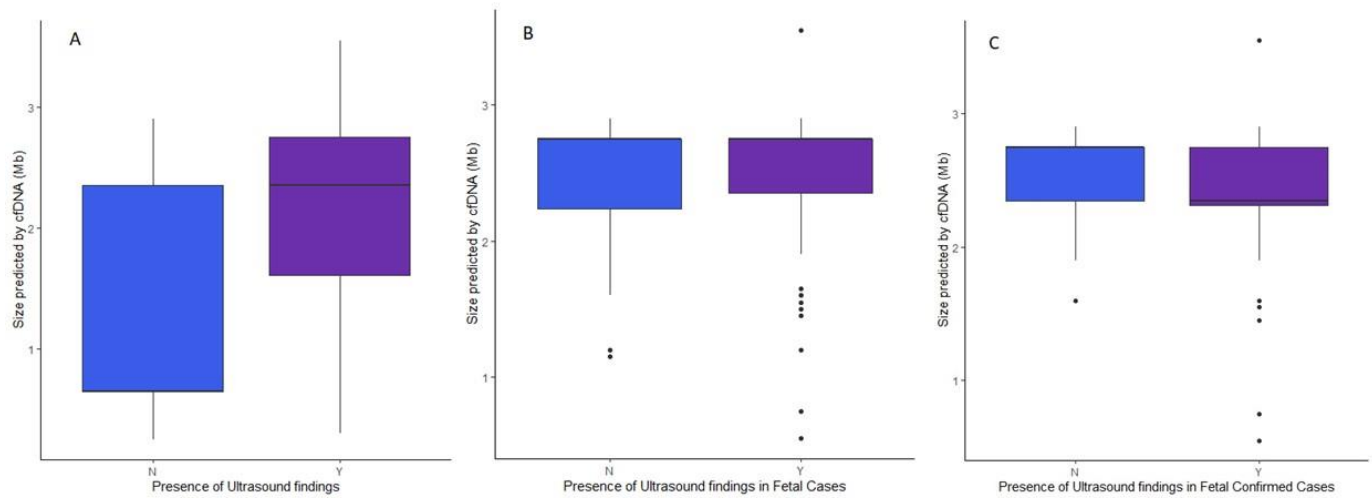

**Supplemental Table 1** – Details of the ‘incomplete’ testing cases

|   | cfDNA details                                                                                                                     | Diagnostic testing details                                                          | Notes                                                                                              |
|---|-----------------------------------------------------------------------------------------------------------------------------------|-------------------------------------------------------------------------------------|----------------------------------------------------------------------------------------------------|
| 1 | RI: Ultrasound finding, testing at 21 weeks; Suspected <b>fetal</b> deletion; MR and cfDNA size NA                                | Maternal array and karyotype only (both negative); <b>no fetal testing</b>          | Heart defect on ultrasound                                                                         |
| 2 | RI: Ultrasound finding, testing at 25 weeks, Suspected <b>fetal</b> deletion; MR and cfDNA size NA                                | Parental arrays only (both negative); <b>no fetal testing</b>                       | TOF, polyhydramnios, and absent pulmonary valve on ultrasound                                      |
| 3 | RI: Maternal age, testing at 21 weeks, Suspected <b>maternal</b> deletion; MR and cfDNA size NA                                   | No fetal testing; maternal testing via FISH only (negative), <b>no microarray</b>   | Atypical deletion predicted                                                                        |
| 4 | RI: No known high-risk indication, testing at 16 weeks, Suspected <b>maternal</b> deletion; MR 13.448, 0.55 Mb deletion predicted | No fetal testing; maternal FISH and karyotype only (negative), <b>no microarray</b> | Provider noted <i>TUPLE1</i> probe was used; <i>HIRA</i> gene not included in region seen on cfDNA |

|    |                                                                                                                                  |                                                                                                                                                                     |                                                                                                                |
|----|----------------------------------------------------------------------------------------------------------------------------------|---------------------------------------------------------------------------------------------------------------------------------------------------------------------|----------------------------------------------------------------------------------------------------------------|
| 5  | RI: No known high-risk indication, testing at 11 weeks, Suspected <b>maternal</b> deletion; MR 14.21, 0.65 Mb deletion predicted | No fetal testing; maternal FISH only (negative), <b>no microarray</b>                                                                                               | Atypical deletion predicted                                                                                    |
| 6  | RI: Maternal age, testing at 12 weeks, Suspected <b>maternal</b> deletion; MR 10.162, 0.65 Mb deletion predicted                 | No fetal testing; maternal FISH only (negative), <b>no microarray</b>                                                                                               | Atypical deletion predicted                                                                                    |
| 7  | RI: No known high-risk indication, testing at 12 weeks, Suspected <b>maternal</b> deletion; MR 5.652, 0.65 Mb deletion predicted | No fetal testing; maternal blood karyotype only (negative), <b>no microarray</b>                                                                                    | Atypical deletion predicted                                                                                    |
| 8  | RI: Maternal age, testing at 10 weeks, Suspected <b>maternal</b> deletion; MR and cfDNA size NA                                  | CVS array, karyotype, and FISH (negative), <b>no maternal testing</b>                                                                                               | Maternal hypothyroid disorder                                                                                  |
| 9  | RI: Maternal age, testing at 15 weeks, Suspected <b>maternal</b> deletion; MR 8.295, 2.35 Mb deletion predicted                  | Postnatal array (negative), <b>no maternal testing</b>                                                                                                              |                                                                                                                |
| 10 | RI: Maternal age, testing at 11 weeks, Suspected <b>maternal</b> deletion; MR 12.127, 0.65 Mb deletion predicted                 | CVS array (negative), <b>no maternal testing</b>                                                                                                                    | Atypical deletion predicted                                                                                    |
| 11 | RI: Ultrasound finding, testing at 24 weeks, Suspected <b>maternal</b> deletion; MR and cfDNA size NA                            | FISH/karyotype on amnio (both negative), no microarray and <b>no maternal testing</b>                                                                               | 2VC, CPC, Club foot on ultrasound                                                                              |
| 12 | RI: Ultrasound finding, testing at 12 weeks, Suspected <b>maternal</b> deletion; MR 13.38, 2.35 Mb deletion                      | Karyotype on POC specimen after SAB, maternal balanced translocation confirmed (46,XX,t(16;18)(q13;p11.2)mat), no microarray and <b>no maternal microarray/FISH</b> | Ultrasound findings not specified; Maternal phenotype reported with severe LD/DD, dysmorphic facies reportedly |

|    |                                                                                                                    |                                                                                       |                                   |
|----|--------------------------------------------------------------------------------------------------------------------|---------------------------------------------------------------------------------------|-----------------------------------|
|    |                                                                                                                    |                                                                                       | consistent with 22q11.2DS         |
| 13 | RI: Ultrasound finding, testing at 22 weeks, Suspected <b>maternal</b> deletion; MR and cfDNA size NA              | FISH/karyotype on amnio (both negative), no microarray and <b>no maternal testing</b> | Bilateral CPCs                    |
| 14 | RI: Ultrasound finding, testing at 18 weeks, Suspected <b>maternal</b> deletion; MR: 8.29, cfDNA size NA           | Amnio karyotype (negative), no microarray and <b>no maternal testing</b>              | CPCs                              |
| 15 | RI: Ultrasound finding, testing at 30 weeks, Suspected <b>maternal</b> deletion; MR: 19.402, 0.65 Mb deletion      | No fetal testing, Maternal FISH only (negative), <b>no microarray</b>                 | IUGR; Atypical deletion predicted |
| 16 | RI: None provided, testing at 10 weeks, Suspected <b>maternal</b> deletion; MR: 14.754, 0.65 Mb deletion           | No fetal testing, Maternal karyotype only (negative), <b>no microarray</b>            | Atypical deletion predicted       |
| 17 | RI: No known high-risk indication, GA not provided, suspected <b>maternal</b> deletion; MR 15.49, 0.65 Mb deletion | FISH/karyotype on amnio (both negative), no microarray and <b>no maternal testing</b> | Atypical deletion predicted       |

*cfDNA* = cell-free DNA, *RI* = referral indication, *MR* = mosaicism ratio, *Mb* = megabase, *NA* = not available, *TOF* = tetralogy of fallot, *FISH* = fluorescent in situ hybridization, *2VC* = two vessel cord, *CPC* = choroid plexus cyst(s), *LD/DD* = learning difficulties/developmental delay, *22q11.2DS* = 22q11.2 deletion syndrome, *IUGR* = intrauterine growth restriction, *GA* = gestational age

**Supplemental Table 2** – PPV calculations

|                                                                                                                                                                                | True positive | False Positive | PPV                              |
|--------------------------------------------------------------------------------------------------------------------------------------------------------------------------------|---------------|----------------|----------------------------------|
| Total cases with complete diagnostic testing (n=177)                                                                                                                           | 176           | 1              | 99.4%<br>(95% CI: 96.4% - 99.9%) |
| <ul style="list-style-type: none"> <li>75 suspected fetal cases with fetal testing (74 TP, 1 FP)</li> <li>97 suspected maternal cases with maternal testing (97 TP)</li> </ul> |               |                |                                  |

|                                                                                                             |     |     |                                   |
|-------------------------------------------------------------------------------------------------------------|-----|-----|-----------------------------------|
| <ul style="list-style-type: none"> <li>5 suspected maternal cases with only fetal testing (5 TP)</li> </ul> |     |     |                                   |
| Treating 'incomplete' as FP (n = 194)                                                                       | 176 | 18  | 90.7%<br>(95% CI: 85.5% - 94.2%)  |
| Cases with fetal testing + fetus suspected (minus maternal suspected cases) (n = 75)                        | 74  | 1   | 98.7%<br>(95% CI: 91.8% - 99.9%)  |
| Also including cases without diagnostic testing (n=307) as either:                                          |     |     |                                   |
| <ul style="list-style-type: none"> <li>All FP</li> </ul>                                                    | 176 | 131 | 57.3%<br>(95% CI: 51.6% - 62.9%)  |
| <ul style="list-style-type: none"> <li>All TP</li> </ul>                                                    | 306 | 1   | 99.7%<br>(95% CI: 97.9% - >99.9%) |

PPV = positive predictive value, FP = false positive, TP = true positive

**Supplemental Figure 3** – Flow chart summarizing the diagnostic testing for the 194 cases with diagnostic follow-up

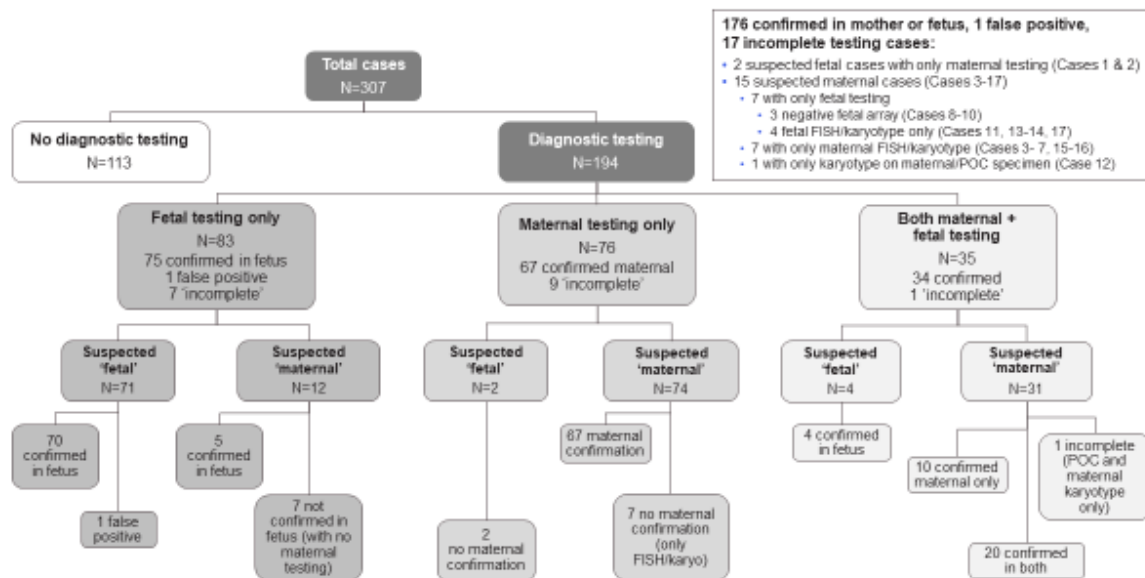

**Supplemental Table 3** – Details of diagnostic testing specimens and assays.

|                                                                  |     |
|------------------------------------------------------------------|-----|
| No diagnostic testing                                            | 113 |
| Confirmation in fetus/baby (specimen and assay type unspecified) | 9   |
| CVS FISH                                                         | 4   |
| CVS karyotype                                                    | 2   |
| CVS microarray                                                   | 6   |
| Amniotic fluid FISH                                              | 8   |
| Amniotic fluid karyotype                                         | 13  |
| Amniotic fluid microarray                                        | 35  |
| Amniotic fluid - assay type unspecified                          | 1   |
| POC FISH                                                         | 1   |
| POC karyotype                                                    | 2   |
| POC microarray                                                   | 3   |
| Postnatal (Neonatal) FISH                                        | 12  |
| Postnatal (Neonatal) microarray                                  | 31  |
| Postnatal (Neonatal) - assay type unspecified                    | 10  |
| Maternal FISH                                                    | 21  |
| Maternal karyotype                                               | 6   |
| Maternal microarray                                              | 58  |
| Maternal testing - assay type unspecified                        | 28  |

*Note that most cases (n=137) had only one diagnostic test on a single specimen type, however, there were 48 cases that involved testing on either multiple assays or specimens (for example, both maternal and fetal microarray or both FISH and microarray on an amniotic fluid specimen), so the counts in the table are not mutually exclusive. CVS = chorionic villus sampling, FISH = fluorescence in situ hybridization, POC = products of conception*

**Supplemental Table 4** – Summary of the available details for cases with reported ultrasound findings

|                                     |           |
|-------------------------------------|-----------|
| <b>Cardiac (Isolated)</b>           | <b>71</b> |
| TOF                                 | 22        |
| VSD                                 | 7         |
| Truncus arteriosus                  | 4         |
| Aortic valve stenosis               | 1         |
| Complex or multiple cardiac anomaly | 15        |

|                                                  |                                                                                           |           |
|--------------------------------------------------|-------------------------------------------------------------------------------------------|-----------|
|                                                  | Unspecified cardiac anomaly                                                               | 20        |
| <b>Cardiac + Renal</b>                           |                                                                                           | <b>6</b>  |
|                                                  | TOF + Pyelectasis                                                                         | 1         |
|                                                  | Truncus arteriosus + Renal Anomalies NOS                                                  | 1         |
|                                                  | Right aortic arch with vascular ring + Multicystic dysplastic kidney                      | 1         |
|                                                  | Cardiac anomaly NOS + Pyelectasis                                                         | 1         |
|                                                  | Cardiac anomaly NOS + Renal anomalies NOS                                                 | 1         |
|                                                  | Cardiac anomaly NOS + Cystic kidney + Umbilical vein varix                                | 1         |
| <b>Cardiac + Additional findings (Non-Renal)</b> |                                                                                           | <b>18</b> |
|                                                  | With facial cleft (Cardiac anomaly NOS x1)                                                | 1         |
|                                                  | With fetal demise (Ductus arteriosus x1, Cardiac anomaly NOS x1)                          | 2         |
|                                                  | With polyhydramnios (TOF x2, Cardiac anomaly NOS x2)                                      | 4         |
|                                                  | With IUGR (Truncus arteriosus x1, Cardiac anomaly NOS x1)                                 | 2         |
|                                                  | With echogenic lungs (Cardiac anomaly NOS x1)                                             | 1         |
|                                                  | With soft markers (Coarctation of the aorta/EIF x1, Aortic arch anomaly/EIF/Absent NB x1) | 2         |
|                                                  | Cardiac anomaly NOS + Shortened long bones + CNS anomaly NOS + Absent NB                  | 1         |
|                                                  | TOF + Absent thymus + Low set ears                                                        | 1         |
|                                                  | VSD + Polyhydramnios + Cleft palate                                                       | 1         |
|                                                  | Complex cardiac anomaly + Suspected esophageal atresia + Polyhydramnios                   | 1         |
|                                                  | Left-sided superior vena cava + 2VC + IUGR                                                | 1         |
|                                                  | Complex cardiac anomaly + 2VC + Bilateral clubbed feet                                    | 1         |
| <b>IUGR</b>                                      |                                                                                           | <b>11</b> |
|                                                  | Isolated IUGR                                                                             | 7         |
|                                                  | With cleft lip                                                                            | 1         |
|                                                  | With duodenal atresia                                                                     | 1         |
|                                                  | With stillbirth                                                                           | 1         |
|                                                  | With soft markers (EIF + 2VC)                                                             | 1         |
| <b>Fluid</b>                                     |                                                                                           | <b>4</b>  |
|                                                  | Polyhydramnios                                                                            | 4         |
| <b>Lymphatic</b>                                 |                                                                                           | <b>3</b>  |
|                                                  | Increased NT                                                                              | 2         |

|                                  |                                                                                   |           |
|----------------------------------|-----------------------------------------------------------------------------------|-----------|
|                                  | Cystic hygroma + hydrops                                                          | 1         |
| <b>Nervous system</b>            |                                                                                   |           |
|                                  | Neural tube defect                                                                | 2         |
| <b>NOS</b>                       |                                                                                   | <b>19</b> |
| <b>Other Structural Anomaly</b>  |                                                                                   | <b>3</b>  |
|                                  | Omphalocele                                                                       | 1         |
|                                  | Diaphragmatic hernia                                                              | 2         |
| <b>Renal</b>                     |                                                                                   | <b>7</b>  |
|                                  | Pyelectasis                                                                       | 1         |
|                                  | Bilateral renal agenesis                                                          | 1         |
|                                  | Anhydramnios + Renal anomalies NOS                                                | 1         |
|                                  | Oligohydramnios + Absent right kidney                                             | 1         |
|                                  | Unilateral renal agenesis + Unilateral club foot                                  | 1         |
|                                  | Bilateral hydronephrosis + Clubbed feet                                           | 1         |
|                                  | Multicystic kidney + Unilateral urinary tract dilatation + Bilateral CPCs         | 1         |
| <b>Skeletal</b>                  |                                                                                   | <b>2</b>  |
|                                  | Unilateral clubfoot                                                               | 1         |
|                                  | Bilateral clubbed feet + Polyhydramnios                                           | 1         |
| <b>Soft markers</b>              |                                                                                   | <b>7</b>  |
|                                  | CPCs                                                                              | 2         |
|                                  | Absent NB                                                                         | 1         |
|                                  | EIF + 2VC                                                                         | 1         |
|                                  | CPC + EIF                                                                         | 1         |
|                                  | EIF                                                                               | 1         |
|                                  | EIF + Echogenic bowel + Fetal demise                                              | 1         |
| <b>Multisystem (non-cardiac)</b> |                                                                                   | <b>6</b>  |
|                                  | 2VC + CPC + Clubfoot                                                              | 1         |
|                                  | MCA NOS                                                                           | 3         |
|                                  | Polyhydramnios + Abnormal ear + Clinodactyly                                      | 1         |
|                                  | Polyhydramnios + Unilateral clubbed foot + Sandal-gap toe + Unable to see stomach | 1         |



*TOF = tetralogy of fallot, VSD = ventricular septal defect, NOS = Not otherwise specified, IUGR = intrauterine growth restriction, EIF = echogenic intracardiac focus, NB = nasal bone, CNS = central nervous system, 2VC = two vessel cord, NT = nuchal translucency, CPCs = choroid plexus cysts, MCA = multiple congenital anomalies*

**Supplemental Table 5** – Details of the cases with additional findings from microarray

| <b>Case</b> | <b>Assay details</b>   | <b>Additional array finding(s)</b>                                                    |
|-------------|------------------------|---------------------------------------------------------------------------------------|
| Case S1     | Maternal blood array   | 1.61 Mb interstitial duplication of 9q33.1; 570 kb interstitial duplication of 2p16.3 |
| Case S2     | POC + cord blood array | 1.33 Mb interstitial duplication of 17p12                                             |
| Case S3     | Maternal blood array   | 853 kb interstitial duplication of Xp22.2                                             |
| Case S4     | Maternal blood array   | 700 kb gain of 4p16.1                                                                 |
| Case S5     | Maternal blood array   | 853 kb interstitial duplication of Xp22.2                                             |
| Case S6     | Amniotic fluid array   | 546 kb interstitial duplication of 15q26.3                                            |
| Case S7     | Maternal blood array   | 855 kb interstitial deletion of 15q11.2                                               |
| Case S8     | Maternal blood array   | 472 kb interstitial duplication of 12q23.2                                            |
| Case S9     | Neonatal array         | 255 kb interstitial deletion of 20p12.1                                               |
| Case S10    | Maternal blood array   | 667 kb interstitial duplication of 6q27                                               |
| Case S11    | Neonatal array         | 255 kb interstitial deletion of 6p25.1                                                |
| Case S12    | Maternal blood array   | 94 kb interstitial deletion of 9p24.1                                                 |
| Case S13    | Maternal blood array   | “Small duplication on 15q” – verbal report from provider                              |
| Case S14    | Maternal blood array   | 2.09 Mb interstitial duplication of 20q13.33                                          |
| Case S15    | Maternal blood array   | 667 kb interstitial duplication of 6q27                                               |

|          |                      |                                        |
|----------|----------------------|----------------------------------------|
| Case S16 | Maternal blood array | 22 kb interstitial deletion of 14q31.3 |
|----------|----------------------|----------------------------------------|

*POC = products of conception, Mb = Megabases, kb = kilobases*

**Supplemental Table 6:** Clinical details of cases without diagnostic testing.

| Case Identifier | Screening indication                                     | Suspected origin on cfDNA sequencing data | Ultrasound findings reported? | If yes, details:                       | Notes                       |
|-----------------|----------------------------------------------------------|-------------------------------------------|-------------------------------|----------------------------------------|-----------------------------|
| 6               | Maternal age, Ultrasound finding                         | Fetal                                     | Y                             | NOS                                    |                             |
| 11              | Ultrasound finding                                       | Fetal                                     | Y                             | TOF, pyelectasis                       | Patient moved, no follow-up |
| 18              | Personal or family history                               | Fetal                                     | N                             |                                        |                             |
| 25              | Ultrasound finding                                       | Fetal                                     | Y                             | IUGR                                   |                             |
| 33              | Abnormal serum biochemical screening, Ultrasound finding | Maternal                                  | Y                             | Truncus arteriosus and renal anomalies |                             |
| 35              | Ultrasound finding                                       | Fetal                                     | Y                             | IUGR, cleft lip                        |                             |
| 37              | Maternal age                                             | Maternal                                  | N                             |                                        | Declined testing            |

|    |                                                    |          |   |                                  |                     |
|----|----------------------------------------------------|----------|---|----------------------------------|---------------------|
| 38 | Ultrasound finding                                 | Fetal    | Y | NOS                              | LTFU                |
| 40 | Ultrasound finding                                 | Maternal | Y | Anhydramnios and renal anomalies | TOP, no POC testing |
| 41 | No known high risk                                 | Maternal | N |                                  | LTFU                |
| 43 | Ultrasound finding                                 | Fetal    | Y | TOF                              |                     |
| 44 | Maternal age                                       | Maternal | N |                                  |                     |
| 47 | Maternal age, Abnormal serum biochemical screening | Maternal | N |                                  |                     |
| 57 | Maternal age                                       | Maternal | N |                                  |                     |
| 58 | Maternal age                                       | Maternal | N |                                  |                     |
| 59 | Maternal age                                       | Maternal | N |                                  | TOP, no testing     |
| 60 | Maternal age                                       | Maternal | N |                                  |                     |
| 62 | Ultrasound finding                                 | Fetal    | Y | Polyhydramnios                   |                     |
| 64 | Abnormal serum biochemical screening               | Maternal | N |                                  |                     |

|    |                                                          |          |   |                                    |                                    |
|----|----------------------------------------------------------|----------|---|------------------------------------|------------------------------------|
| 68 | None provided                                            | Maternal | N |                                    |                                    |
| 72 | Maternal age                                             | Maternal | N |                                    |                                    |
| 75 | Maternal age                                             | Maternal | N |                                    |                                    |
| 78 | Ultrasound finding                                       | Fetal    | Y | Polyhydramnios , cleft palate, VSD |                                    |
| 79 | Ultrasound finding                                       | Fetal    | Y | Complex heart defect               |                                    |
| 82 | Maternal age                                             | Fetal    | N |                                    |                                    |
| 86 | Ultrasound finding, Maternal age                         | Maternal | Y | Heart defect NOS                   |                                    |
| 91 | Abnormal serum biochemical screening, Ultrasound finding | Maternal | Y | NOS                                |                                    |
| 93 | Maternal age                                             | Maternal | N |                                    |                                    |
| 94 | Ultrasound finding                                       | Maternal | Y | Multiple congenital anomalies      | cfDNA also positive for trisomy 21 |
| 95 | Maternal age                                             | Maternal | N |                                    |                                    |
| 97 | Ultrasound finding                                       | Maternal | Y | NOS                                |                                    |

|     |                            |          |   |                                                                           |  |
|-----|----------------------------|----------|---|---------------------------------------------------------------------------|--|
| 98  | Ultrasound finding         | Fetal    | Y | NOS                                                                       |  |
| 105 | Ultrasound finding         | Maternal | Y | IUGR                                                                      |  |
| 111 | Maternal age               | Maternal | N |                                                                           |  |
| 112 | None provided              | Maternal | N |                                                                           |  |
| 116 | Ultrasound finding         | Fetal    | Y | VSD                                                                       |  |
| 120 | Personal or family history | Maternal | N |                                                                           |  |
| 125 | Maternal age               | Maternal | N |                                                                           |  |
| 127 | Ultrasound finding         | Fetal    | Y | Truncus arteriosus, VSD                                                   |  |
| 128 | Ultrasound finding         | Fetal    | Y | Fetal cardiac anomalies NOS, pulmonary stenosis / VSD / ? aortic stenosis |  |
| 135 | Ultrasound finding         | Fetal    | Y | EIF and 2VC                                                               |  |
| 137 | Maternal age               | Fetal    | N |                                                                           |  |
| 139 | Ultrasound finding         | Fetal    | Y | 2VC, left SVC, SGA                                                        |  |

|     |                    |          |   |                                      |                                          |
|-----|--------------------|----------|---|--------------------------------------|------------------------------------------|
| 140 | Ultrasound finding | Fetal    | Y | TOF                                  |                                          |
| 142 | Ultrasound finding | Fetal    | Y | Heart defect NOS and polyhydramnios  |                                          |
| 144 | Ultrasound finding | Fetal    | Y | Truncus arteriosus                   |                                          |
| 145 | Ultrasound finding | Fetal    | Y | Heart defect NOS                     |                                          |
| 146 | Ultrasound finding | Fetal    | Y | Heart defect NOS and renal anomalies |                                          |
| 148 | Maternal age       | Maternal | N |                                      | Egg donor gestation so fetus not at risk |
| 151 | Ultrasound finding | Fetal    | Y | Heart defect NOS, IUFD               |                                          |
| 152 | Maternal age       | Maternal | N |                                      |                                          |
| 155 | Maternal age       | Maternal | N |                                      |                                          |
| 158 | None provided      | Fetal    | N |                                      |                                          |
| 160 | Maternal age       | Maternal | N |                                      |                                          |
| 164 | Ultrasound finding | Fetal    | Y | TOF                                  |                                          |
| 167 | Maternal age       | Maternal | N |                                      |                                          |

|     |                    |          |   |                                            |                             |
|-----|--------------------|----------|---|--------------------------------------------|-----------------------------|
| 168 | Maternal age       | Maternal | N |                                            |                             |
| 170 | Ultrasound finding | Maternal | Y | CPC, EIF                                   |                             |
| 172 | No known high risk | Maternal | N |                                            |                             |
| 174 | Maternal age       | Fetal    | N |                                            |                             |
| 177 | Maternal age       | Maternal | N |                                            |                             |
| 178 | Maternal age       | Fetal    | N |                                            |                             |
| 179 | Ultrasound finding | Fetal    | Y | Heart defect NOS                           |                             |
| 180 | Ultrasound finding | Fetal    | Y | Heart defect NOS                           |                             |
| 181 | Maternal age       | Fetal    | N |                                            |                             |
| 182 | Ultrasound finding | Fetal    | Y | NOS                                        |                             |
| 184 | No known high risk | Fetal    | Y | Right sided aortic arch with vascular ring |                             |
| 187 | Ultrasound finding | Fetal    | Y | VSD; small aortic valve and arch           | Negative maternal karyotype |
| 188 | Ultrasound finding | Fetal    | Y | TOF                                        |                             |

|     |                                                                  |          |   |                                                                                 |                                                                                                            |
|-----|------------------------------------------------------------------|----------|---|---------------------------------------------------------------------------------|------------------------------------------------------------------------------------------------------------|
| 190 | Maternal age                                                     | Maternal | N |                                                                                 | Prior child with DiGeorge (unclear whether diagnosis based on clinical features or confirmed with testing) |
| 191 | Ultrasound finding                                               | Fetal    | Y | TOF                                                                             | LTFU                                                                                                       |
| 194 | Maternal age                                                     | Maternal | N |                                                                                 |                                                                                                            |
| 198 | Abnormal serum biochemical screening, Personal or family history | Maternal | N |                                                                                 | Prior child with DiGeorge (unclear whether diagnosis based on clinical features or confirmed with testing) |
| 199 | Ultrasound finding                                               | Fetal    | Y | Truncus arteriosus, IUGR                                                        |                                                                                                            |
| 200 | Ultrasound finding                                               | Fetal    | Y | TOF                                                                             |                                                                                                            |
| 203 | Ultrasound finding                                               | Fetal    | Y | Heart defect NOS                                                                |                                                                                                            |
| 204 | Ultrasound finding                                               | Fetal    | Y | Unilateral club foot; sandle-gap toe; polyhydramnios; didn't visualize stomach. |                                                                                                            |
| 206 | Ultrasound finding                                               | Fetal    | Y | Complex cardiac defect                                                          |                                                                                                            |



|     |                                                          |          |   |                                   |                                                                |
|-----|----------------------------------------------------------|----------|---|-----------------------------------|----------------------------------------------------------------|
| 211 | Ultrasound finding                                       | Maternal | Y | Heart defect NOS; echogenic lungs |                                                                |
| 212 | Ultrasound finding                                       | Maternal | Y | EIF left ventricle                |                                                                |
| 217 | None provided                                            | Maternal | N |                                   |                                                                |
| 219 | No known high risk                                       | Maternal | N |                                   |                                                                |
| 222 | No known high risk                                       | Maternal | N |                                   | Patient tested with subsequent pregnancy with similar findings |
| 223 | Personal or family history                               | Maternal | N |                                   |                                                                |
| 229 | Ultrasound finding                                       | Maternal | Y | Bilateral renal agenesis          |                                                                |
| 231 | Ultrasound finding                                       | Fetal    | Y | TOF                               |                                                                |
| 233 | Maternal age                                             | Maternal | N |                                   |                                                                |
| 236 | Ultrasound finding                                       | Maternal | Y | NOS                               | Patient had TOP; Severe diabetic                               |
| 239 | Ultrasound finding, Abnormal serum biochemical screening | Fetal    | Y | TOF, absent pulmonary valves      |                                                                |

|     |                                  |          |   |                                                     |  |
|-----|----------------------------------|----------|---|-----------------------------------------------------|--|
| 240 | Ultrasound finding               | Fetal    | Y | EIF, absent nasal bone, aortic arch                 |  |
| 243 | Ultrasound finding               | Fetal    | Y | TOF and major aortopulmonary collateral anastomoses |  |
| 252 | Ultrasound finding               | Fetal    | Y | VSD and aortic stenosis                             |  |
| 257 | Personal or family history       | Maternal | N |                                                     |  |
| 258 | Ultrasound finding               | Fetal    | Y | NOS                                                 |  |
| 263 | Maternal age                     | Maternal | N |                                                     |  |
| 265 | No known high risk               | Fetal    | N |                                                     |  |
| 266 | Maternal age, Ultrasound finding | Fetal    | Y | Heart defect NOS                                    |  |
| 270 | Ultrasound finding               | Maternal | Y | Diaphragmatic hernia                                |  |
| 274 | Maternal age                     | Fetal    | N |                                                     |  |
| 277 | No known high risk               | Maternal | N |                                                     |  |

|     |                    |          |   |                  |                                                         |
|-----|--------------------|----------|---|------------------|---------------------------------------------------------|
| 282 | Ultrasound finding | Fetal    | Y | Heart defect NOS |                                                         |
| 283 | None provided      | Maternal | N |                  | Declined testing                                        |
| 285 | No known high risk | Maternal | N |                  |                                                         |
| 286 | None provided      | Maternal | N |                  |                                                         |
| 289 | Ultrasound finding | Maternal | Y | NOS              |                                                         |
| 291 | Ultrasound finding | Fetal    | Y | NOS              |                                                         |
| 295 | No known high risk | Maternal | N |                  | Normal ultrasound at 15 weeks; patient declined testing |
| 297 | No known high risk | Maternal | N |                  |                                                         |
| 299 | None provided      | Maternal | N |                  |                                                         |
| 301 | None provided      | Maternal | N |                  | Patient declined testing, normal anatomy scan           |
| 304 | No known high risk | Maternal | N |                  |                                                         |
| 305 | Ultrasound finding | Fetal    | Y | NOS              |                                                         |

|     |                    |          |   |  |  |
|-----|--------------------|----------|---|--|--|
| 307 | No known high risk | Maternal | N |  |  |
|-----|--------------------|----------|---|--|--|

*TOF = tetralogy of fallot, VSD = ventricular septal defect, NOS = Not otherwise specified, IUGR = intrauterine growth restriction, EIF = echogenic intracardiac focus, NB = nasal bone, CNS = central nervous system, 2VC = two vessel cord, NT = nuchal translucency, CPCs = choroid plexus cysts, LFTU = lost to follow-up, TOP = termination of pregnancy, SGA = small for gestational age, SVC = superior vena cava, IUFD = intrauterine fetal demise*

**Supplemental Table 7:** Ultrasound details for suspected fetal cases with diagnostic testing (74 true positive fetal cases and 1 false positive case)

| Case Identifier | Ultrasound findings reported? | If yes, details:                                                                                   | Classification |
|-----------------|-------------------------------|----------------------------------------------------------------------------------------------------|----------------|
| 1               | Y                             | TOF                                                                                                | True Positive  |
| 2               | Y                             | TOF                                                                                                | True Positive  |
| 5               | Y                             | Heart defect (unspecified)                                                                         | True Positive  |
| 10              | Y                             | Heart defect (unspecified), shortened long bones, CNS abnormality (unspecified), absent nasal bone | True Positive  |
| 13              | Y                             | TOF                                                                                                | True Positive  |
| 21              | Y                             | Thick NT                                                                                           | True Positive  |
| 22              | Y                             | Myelomeningocele                                                                                   | True Positive  |
| 26              | Y                             | VSD, coarctation of the aorta                                                                      | True Positive  |
| 30              | Y                             | NOS                                                                                                | True Positive  |
| 34              | Y                             | NOS                                                                                                | True Positive  |

|    |   |                                            |               |
|----|---|--------------------------------------------|---------------|
| 36 | Y | Heart defect (unspecified)                 | True Positive |
| 39 | Y | VSD                                        | True Positive |
| 42 | Y | IUGR                                       | True Positive |
| 49 | N |                                            | True Positive |
| 51 | Y | Heart defect (unspecified)                 | True Positive |
| 61 | Y | Polyhydramnios, heart defect (unspecified) | True Positive |
| 65 | Y | VSD                                        | True Positive |
| 66 | Y | Pyelectasis                                | True Positive |
| 67 | N |                                            | True Positive |
| 70 | N |                                            | True Positive |
| 74 | Y | IUGR, duodenal atresia                     | True Positive |
| 80 | Y | Heart defect (unspecified)                 | True Positive |
| 81 | Y | TOF                                        | True Positive |
| 83 | Y | Heart defect (unspecified)                 | True Positive |
| 87 | Y | Truncus arteriosus                         | True Positive |
| 89 | Y | Polyhydramnios                             | True Positive |
| 90 | Y | TOF                                        | True Positive |

|     |   |                                                                                                |               |
|-----|---|------------------------------------------------------------------------------------------------|---------------|
| 100 | Y | Heart defect (unspecified)                                                                     | True Positive |
| 101 | Y | Cystic hygroma, hydrops                                                                        | True Positive |
| 102 | Y | Coarctation of aorta and EIF                                                                   | True Positive |
| 104 | Y | Right aortic arch, vascular ring, multicystic dysplastic kidney                                | True Positive |
| 107 | Y | VSD                                                                                            | True Positive |
| 110 | N |                                                                                                | True Positive |
| 113 | Y | Unilateral renal agenesis, unilateral club foot                                                | True Positive |
| 115 | Y | Echogenic bowel, EIF, IUFD                                                                     | True Positive |
| 117 | Y | NOS                                                                                            | True Positive |
| 118 | Y | Ductus arteriosus; infant demise                                                               | True Positive |
| 126 | Y | Heart defect and pyelectasis                                                                   | True Positive |
| 129 | Y | TOF                                                                                            | True Positive |
| 130 | Y | 2VC, complex heart defect (unspecified), polyhydramnios, esophageal atresia?, perinatal demise | True Positive |
| 131 | Y | Heart defect (unspecified)                                                                     | True Positive |
| 132 | N |                                                                                                | True Positive |
| 133 | N |                                                                                                | True Positive |

|     |   |                                                                            |                |
|-----|---|----------------------------------------------------------------------------|----------------|
| 136 | Y | Heart defect (unspecified); IUGR                                           | True Positive  |
| 138 | N |                                                                            | True Positive  |
| 141 | Y | Unilateral clubfoot                                                        | True Positive  |
| 147 | N |                                                                            | True Positive  |
| 154 | Y | Omphalocele                                                                | True Positive  |
| 156 | Y | Polyhydramnios, abnormal ear, clinodactyly                                 | True Positive  |
| 161 | Y | TOF, polyhydramnios                                                        | True Positive  |
| 165 | Y | Bilateral clubbed feet, 2VC, VSD, possible transposition of great arteries | True Positive  |
| 169 | Y | Heart defect (unspecified)                                                 | True Positive  |
| 171 | N |                                                                            | False Positive |
| 173 | N |                                                                            | True Positive  |
| 175 | N |                                                                            | True Positive  |
| 176 | Y | TOF                                                                        | True Positive  |
| 186 | N |                                                                            | True Positive  |
| 202 | Y | Cystic kidney; umbilical vein varix; possible heart defect (unspecified)   | True Positive  |
| 208 | Y | Complex heart defect (unspecified)                                         | True Positive  |

|     |   |                                                         |               |
|-----|---|---------------------------------------------------------|---------------|
| 218 | Y | Complex heart defect (unspecified)                      | True Positive |
| 220 | Y | TOF                                                     | True Positive |
| 224 | Y | TOF                                                     | True Positive |
| 232 | Y | TOF                                                     | True Positive |
| 237 | Y | TOF with right aortic arch                              | True Positive |
| 238 | Y | Heart defect (unspecified)                              | True Positive |
| 247 | Y | TOF                                                     | True Positive |
| 249 | Y | Heart defect (unspecified), cleft lip                   | True Positive |
| 254 | Y | IUGR, 2VC, EIF                                          | True Positive |
| 261 | N |                                                         | True Positive |
| 262 | Y | Severe polyhydramnios                                   | True Positive |
| 267 | Y | Bilateral clubbed feet and polyhydramnios               | True Positive |
| 269 | Y | Heart defect (unspecified)                              | True Positive |
| 276 | Y | VSD, vascular ring and aberrant right subclavian artery | True Positive |
| 278 | Y | TOF                                                     | True Positive |
| 292 | Y | VSD                                                     | True Positive |



*TOF = tetralogy of fallot, VSD = ventricular septal defect, NOS = Not otherwise specified, IUGR = intrauterine growth restriction, EIF = echogenic intracardiac focus, NB = nasal bone, CNS = central nervous system, 2VC = two vessel cord, NT = nuchal translucency*
